# Supplementary material for: Venous Thromboembolism, Corticosteroids and COVID-19: A Systematic Review and Meta-Analysis
Source: PubMed Central journal article supplement — Clin Appl Thromb Hemost. 2021 Feb 11;27:1076029621993573. doi: 10.1177/1076029621993573 (PMC7883150; doi:10.1177/1076029621993573), 2021-02-11
Supplement: sj-pdf-1-cat-10.1177_1076029621993573.pdf [file sj-pdf-1-cat-10.1177_1076029621993573.pdf]

| No.       | Author           | VTE vs. No-VTE | Incidence (n/N, %) | Age, year (Mean ± SD) | Male sex (n %) | BMI, kg/m <sup>2</sup> (Mean ± SD) | Hypertension | Diabetes   | Baseline CAD | Current or former Smoker | Malignancy |
|-----------|------------------|----------------|--------------------|-----------------------|----------------|------------------------------------|--------------|------------|--------------|--------------------------|------------|
| <b>1</b>  | Artifon 2020     | VTE            | 16/71 (22.5%)      | 60.2 ± 31             | 11 (68.7%)     | 27.2 ± 2.9                         | 3 (19%)      | 0 (0%)     | -            | 0 (0%)                   | 0 (0%)     |
|           |                  | No-VTE         | 55/71 (77.5%)      | 62.1 ± 20.9           | 32 (58.2%)     | 28 ± 6.2                           | 26 (47%)     | 14 (25%)   | -            | 6 (12%)                  | 4 (7%)     |
| <b>2</b>  | Zhang 2020       | VTE            | 66/143 (46.2%)     | 67 ± 12               | 36 (54.5%)     | 23.6 ± 2.9                         | 28 (42.4%)   | 13 (19.7%) | 9 (13.6%)    | 5 (7.6%)                 | 3 (4.5%)   |
|           |                  | No-VTE         | 77/143 (53.8%)     | 59 ± 16               | 38 (49.4%)     | 23.6 ± 3.1                         | 28 (36.4%)   | 13 (16.9%) | 8 (10.4%)    | 4 (5.2%)                 | 4 (5.2%)   |
| <b>3</b>  | Rodrígueza 2020  | VTE            | 23/156 (14.7%)     | 66.7 ± 15.2           | 14 (60.9%)     | 27.7 ± 5.5                         | -            | -          | -            | -                        | 2 (8.7%)   |
|           |                  | No-VTE         | 133/156 (85.3%)    | 68.4 ± 14.4           | 88 (66.2%)     | 26.8 ± 3.9                         | -            | -          | -            | -                        | 14 (10.5%) |
| <b>4</b>  | Cui 2020         | VTE            | 20/81 (25%)        | 68.4 ± 9.1            | -              | -                                  | -            | -          | -            | -                        | -          |
|           |                  | No-VTE         | 61/81 (75%)        | 57.1 ± 14.3           | -              | -                                  | -            | -          | -            | -                        | -          |
| <b>5</b>  | Trimaille 2020   | VTE            | 49/289 (17%)       | 61.4 ± 15.0           | 33 (67.3%)     | 21 (45.7%)                         | 25 (51.0%)   | 11 (22.4%) | 3 (6.1%)     | 3 (6.1%)                 | 2 (4.1%)   |
|           |                  | No-VTE         | 240/289 (83%)      | 62.4 ± 17.4           | 138 (57.5%)    | 80 (37.2%)                         | 107 (44.6%)  | 48 (20.0%) | 15 (6.3%)    | 8 (3.3%)                 | 6 (2.5%)   |
| <b>6</b>  | Maatman 2020     | VTE            | 31/109 (28.45)     | 60 ± 17               | 20 (65%)       | 34.7 ± 12.7                        | 17 (55%)     | 10 (32%)   | 1 (3.2%)     | 5 (16%)                  | -          |
|           |                  | No-VTE         | 78/109 (71.6%)     | 62 ± 15               | 42 (54%)       | 34.8 ± 11.5                        | 57 (73%)     | 33 (42%)   | -            | 28 (36%)                 | -          |
| <b>7</b>  | Trigonis 2020    | VTE            | 19/45 (42.2%)      | 64.1 ± 14             | -              | 31.8 ± 5.8                         | -            | -          | -            | -                        | -          |
|           |                  | No-VTE         | 26/45 (52.8%)      | 58.3 ± 15.4           | -              | 35.2 ± 11.3                        | -            | -          | -            | -                        | -          |
| <b>8</b>  | Desborough 2020  | VTE            | 10/66 (16.7%)      | 54 ± 15.5             | 8 (80%)        | 28.1 ± 8.4                         | 5 (50%)      | 2 (20%)    | 1 (10%)      | -                        | 2 (20%)    |
|           |                  | No-VTE         | 56/66 (83.3%)      | 59.4 ± 11.4           | 40 (71%)       | 29.9 ± 6                           | 25 (45%)     | 25 (45%)   | 6 (11%)      | -                        | 3 (5%)     |
| <b>9</b>  | Koleilat 2020    | VTE            | 18/135 (13.4%)     | 57.2 ± 12.1           | 11 (61.1%)     | 32 ± 6.1                           | 13 (72.2%)   | 6 (33%)    | 1 (5.6%)     | 3 (16.7%)                | 3 (16.7%)  |
|           |                  | No-VTE         | 117/135 (86.6%)    | 63.3 ± 15             | 61 (52.1%)     | 28.7 ± 6.1                         | 81 (69.2%)   | 45 (38.5%) | 15 (12.8%)   | 39 (33.6%)               | 17 (14.5%) |
| <b>10</b> | Hippensteel 2020 | VTE            | 24/91 (27.4%)      | 55 ± 13               | 14 (58%)       | 32.1 ± 8.5                         | -            | 7 (32%)    | 14 (3%)      | 20 (4%)                  | 0 (0%)     |
|           |                  | No-VTE         | 67/91 (72.6%)      | 57 ± 17               | 39 (58%)       | 32.5 ± 10.4                        | -            | 21 (33%)   | 27 (17%)     | 22 (12%)                 | 5 (3%)     |
| <b>11</b> | Fauvel 2020      | VTE            | 103/1240 (8.3%)    | 63 ± 16               | 73 (70.9%)     | 27.3 ± 5.6                         | 44 (42.7%)   | 19 (18.4%) | 9 (8.7%)     | 44 (42.7%)               | 8 (7.8%)   |

|           |                  |        |                      |             |                |            |             |                |                |             |                |
|-----------|------------------|--------|----------------------|-------------|----------------|------------|-------------|----------------|----------------|-------------|----------------|
|           |                  | No-VTE | 1137/1240<br>(91.7%) | 64 ± 17     | 648<br>(57.0%) | 28.2 ± 6.3 | 515 (45.7%) | 249<br>(22.0%) | 124<br>(10.9%) | 515 (45.7%) | 159<br>(14.0%) |
| <b>12</b> | Soumagne<br>2020 | VTE    | 55/375               | 61.1 ± 9.1  | 46 (84%)       | 29.6 ± 4.7 | 26 (53%)    | 12 (22%)       | 8 (15%)        | -           | 4 (7%)         |
|           |                  | No-VTE | 320/375              | 63.9 ± 10.3 | 242 (76%)      | 29.8 ± 5.6 | 190 (59%)   | 87 (27%)       | 28 (9%)        | -           | 40 (13%)       |

1

2

Continued

| No.      | Author          | VTE history (n, %) | D-Dimer $\mu\text{g/mL}$ (mean $\pm$ SD) | Fibrinogen (g/L) (mean $\pm$ SD) | PT (mean $\pm$ SD) | APTT (mean $\pm$ SD) | Prophylactic anticoagulation (n, %) | Therapeutic anticoagulation (n, %) | Corticosteroid (n, %) | Antibiotics (n, %) | ICU n (%)  | Mortality (n, %) | Comments                                                                                                                                                                                                 |
|----------|-----------------|--------------------|------------------------------------------|----------------------------------|--------------------|----------------------|-------------------------------------|------------------------------------|-----------------------|--------------------|------------|------------------|----------------------------------------------------------------------------------------------------------------------------------------------------------------------------------------------------------|
| <b>1</b> | Artifon 2020    | 2 (13%)            | 2.6 $\pm$ 3.3                            | 5.5 $\pm$ 1.6                    | -                  | -                    | 16 (100%)                           | -                                  | 3 (20%)               | 16 (100%)          | 8 (50%)    | -                |                                                                                                                                                                                                          |
|          |                 | 3 (5%)             | 0.8 $\pm$ 0.5                            | 5.3 $\pm$ 1.8                    | -                  | -                    | 54 (99%)                            | -                                  | 12 (22%)              | 49 (89%)           | 5 (9.1)    | -                |                                                                                                                                                                                                          |
| <b>2</b> | Zhang 2020      | 0 (0.0%)           | 5.6 $\pm$ 4.2                            | -                                | 14.3 $\pm$ 1.6     | 36.4 $\pm$ 8.1       | 22 (33.3%)                          | 59 (89.4%)                         | 34 (51.5%)            | 56 (84.8%)         | 12 (18.2%) | 23 (34.8%)       |                                                                                                                                                                                                          |
|          |                 | 1 (1.3%)           | 1.6 $\pm$ 2.3                            | -                                | 13.1 $\pm$ 1.3     | 34.2 $\pm$ 5.9       | 31 (40.3%)                          | 0 (0.0%)                           | 29 (37.8%)            | 61 (79.2%)         | 3 (3.9%)   | 9 (11.7%)        |                                                                                                                                                                                                          |
| <b>3</b> | Rodrígueza 2020 | -                  | 5.3 $\pm$ 5.7                            | -                                | -                  | -                    | -                                   | -                                  | -                     | -                  | 3 (13.0%)  | -                | 37 patients were excluded due to receiving therapeutic doses of anticoagulation.                                                                                                                         |
|          |                 | -                  | 2.4 $\pm$ 1.6                            | -                                | -                  | -                    | -                                   | -                                  | -                     | -                  | 13 (9.8%)  | -                |                                                                                                                                                                                                          |
| <b>4</b> | Cui 2020        |                    | 5.2 $\pm$ 3.0                            | -                                | 15.4 $\pm$ 1.0     | 39.9 $\pm$ 6.4       | -                                   | -                                  | -                     | -                  | -          | 8/20             | All ICU patients. 37 (46%) patients were males. 20 (25%) patients had hypertension. 8 (10%) patients had diabetes. 10 (12%) patients had baseline CAD. 35 (43%) patients were current or former smokers. |

|          |                 |           |               |           |            |            |            |                |         |   |            |           |                                                                                                                                            |
|----------|-----------------|-----------|---------------|-----------|------------|------------|------------|----------------|---------|---|------------|-----------|--------------------------------------------------------------------------------------------------------------------------------------------|
|          |                 |           | 0.8 ± 1.2     | -         | 15.6 ± 1.0 | 35.6 ± 4.5 | -          | -              | -       | - | -          | 0/61      |                                                                                                                                            |
| <b>5</b> | Trimaille 2020  | 5 (10.2%) | 5.2 ± 5.5     | 6.4 ± 1.8 | 84 ± 18    | 1.2 ± 0.3  | 1 (2%)     | -              | -       | - | 21 (43.8%) | 6 (12.2%) |                                                                                                                                            |
|          |                 | 23 (9.6%) | 1.8 ± 2.5     | 6.4 ± 1.6 | 85 ± 20    | 1.2 ± 0.4  | 31 (12.9%) | -              | -       | - | 51 (21.3%) | 18 (7.5%) |                                                                                                                                            |
| <b>6</b> | Maatman 2020    | 2 (6.7%)  | 1.7 ± 2.4     | 6.3 ± 2.4 | -          | -          | 1 (2.0%)   | 30 (27.5%)     | -       | - | 31 (100%)  | (8) 26%   | All patients were included from the ICU.                                                                                                   |
|          |                 | 0 (0%)    | 0.5 ± 0.4     | 6.9 ± 2.7 | -          | -          | 31 (12.9%) | 78/109 (71.6%) | -       | - | 78 (100%)  | 19 (24%)  |                                                                                                                                            |
| <b>7</b> | Trigonis 2020   | -         | 8.4 ± 7.8     | -         | -          | -          | 1 (5.3%)   | 6 (32%)        | -       | - | -          | -         | All patients were on some form of chemical prophylaxis from the date of their admission. All patients were admitted to the ICU.            |
|          |                 | -         | 3.4 ± 2.7     | -         | -          | -          | 3 (11.5%)  | 10 (38%)       | -       | - | -          | -         |                                                                                                                                            |
| <b>8</b> | Desborough 2020 | 1 (10%)   | 161.6 ± 336.1 | 7.9 ± 2.8 |            | 1.2 ± 0.3  | -          | -              | -       | - | -          | -         | All patients were given thromboprophylaxis, admitted to critical care. 11 patients (17%) were treated with treatment dose anticoagulation. |
|          |                 | 4 (7%)    | 1.7 ± 2.1     | 6.1 ± 2   |            | 1.2 ± 0.3  | -          | -              | -       | - | -          | -         |                                                                                                                                            |
| <b>9</b> | Koleilat 2020   | 1 (5.6%)  | 12.5 ± 12.8   | 5.3 ± 1.5 |            | 36.8 ± 8.3 | 12 (85.7%) | 18 (100%)      | 9 (50%) | - | -          | 2 (11.1%) | All patients admitted to the ICU.                                                                                                          |

|           |                     |              |              |           |            |              |             |            |            |                |                |                |                                                                                                 |
|-----------|---------------------|--------------|--------------|-----------|------------|--------------|-------------|------------|------------|----------------|----------------|----------------|-------------------------------------------------------------------------------------------------|
|           |                     | 9<br>(7.9%)  | 5.3 ±<br>5.3 | 6.6 ± 1.8 |            | 54.4<br>± 8  | 74 (63.2%)  | 21 (17.9)  | 36 (30.8%) | -              | -              | 18<br>(16.4%)  |                                                                                                 |
| <b>10</b> | Hippensteel<br>2020 | -            | 0.5 ±<br>0.3 | 0.5 ± 0.3 | -          | -            | -           | 13 (54.3%) | -          | -              | 19<br>(79%)    | 2 (9%)         | Twenty-four<br>patients (261%)<br>were found to<br>have VTE<br>during their<br>hospitalization. |
|           |                     | -            | 1.8 ±<br>6   | 1.8 ± 6   | -          | -            | -           | -          | -          | -              | 42<br>(63%)    | 20 (30%)       |                                                                                                 |
| <b>11</b> | Fauvel<br>2020      | 10<br>(9.7%) | 3.5 ±<br>4.4 | 6.3 ± 2.0 | 83 ±<br>16 | 1.1 ±<br>0.2 | 18 (18.4%)  | 5 (5.1%)   | 10 (9.7%)  | 86<br>(83.5%)  | 32<br>(31.1%)  | 9 (8.7%)       | All medication<br>received before<br>PE.                                                        |
|           |                     | 88<br>(7.7%) | 1.4 ±<br>4.1 | 6.1 ± 1.6 | 85 ±<br>18 | 1.2 ±<br>0.3 | 720 (67.0%) | 94 (8.8%)  | 63 (5.5%)  | 853<br>(75.0%) | 153<br>(13.5%) | 142<br>(12.5%) |                                                                                                 |
| <b>12</b> | Soumagne<br>2020    | 11<br>(20%)  | -            | -         | -          | -            | -           | -          | 13 (26%)   | -              | -              | 25 (45%)       | All medications<br>received before<br>PE.                                                       |
|           |                     | 24 (8%)      | -            | -         | -          | -            | -           | -          | 64 (21%)   | -              | -              | 201<br>(63%)   |                                                                                                 |

**Table 1. Characteristics of included studies.**
